# Supplementary material
Source: publisher figshare collection journal article supplement (https://frontiersin.figshare.com/ndownloader/files/19752857)
Supplement: Supplementary file 1 [file 19752857]

Supplementary Material

Fine scale assemblage structure of benthic invertebrate megafauna on the North Pacific seamount Mokumanamana

Nicole B. Morgan*, Savannah Goode, E. Brendan Roark, Amy R. Baco

*** Correspondence:** Amy R. Baco **abacotaylor@fsu.edu**

# Supplementary Figures


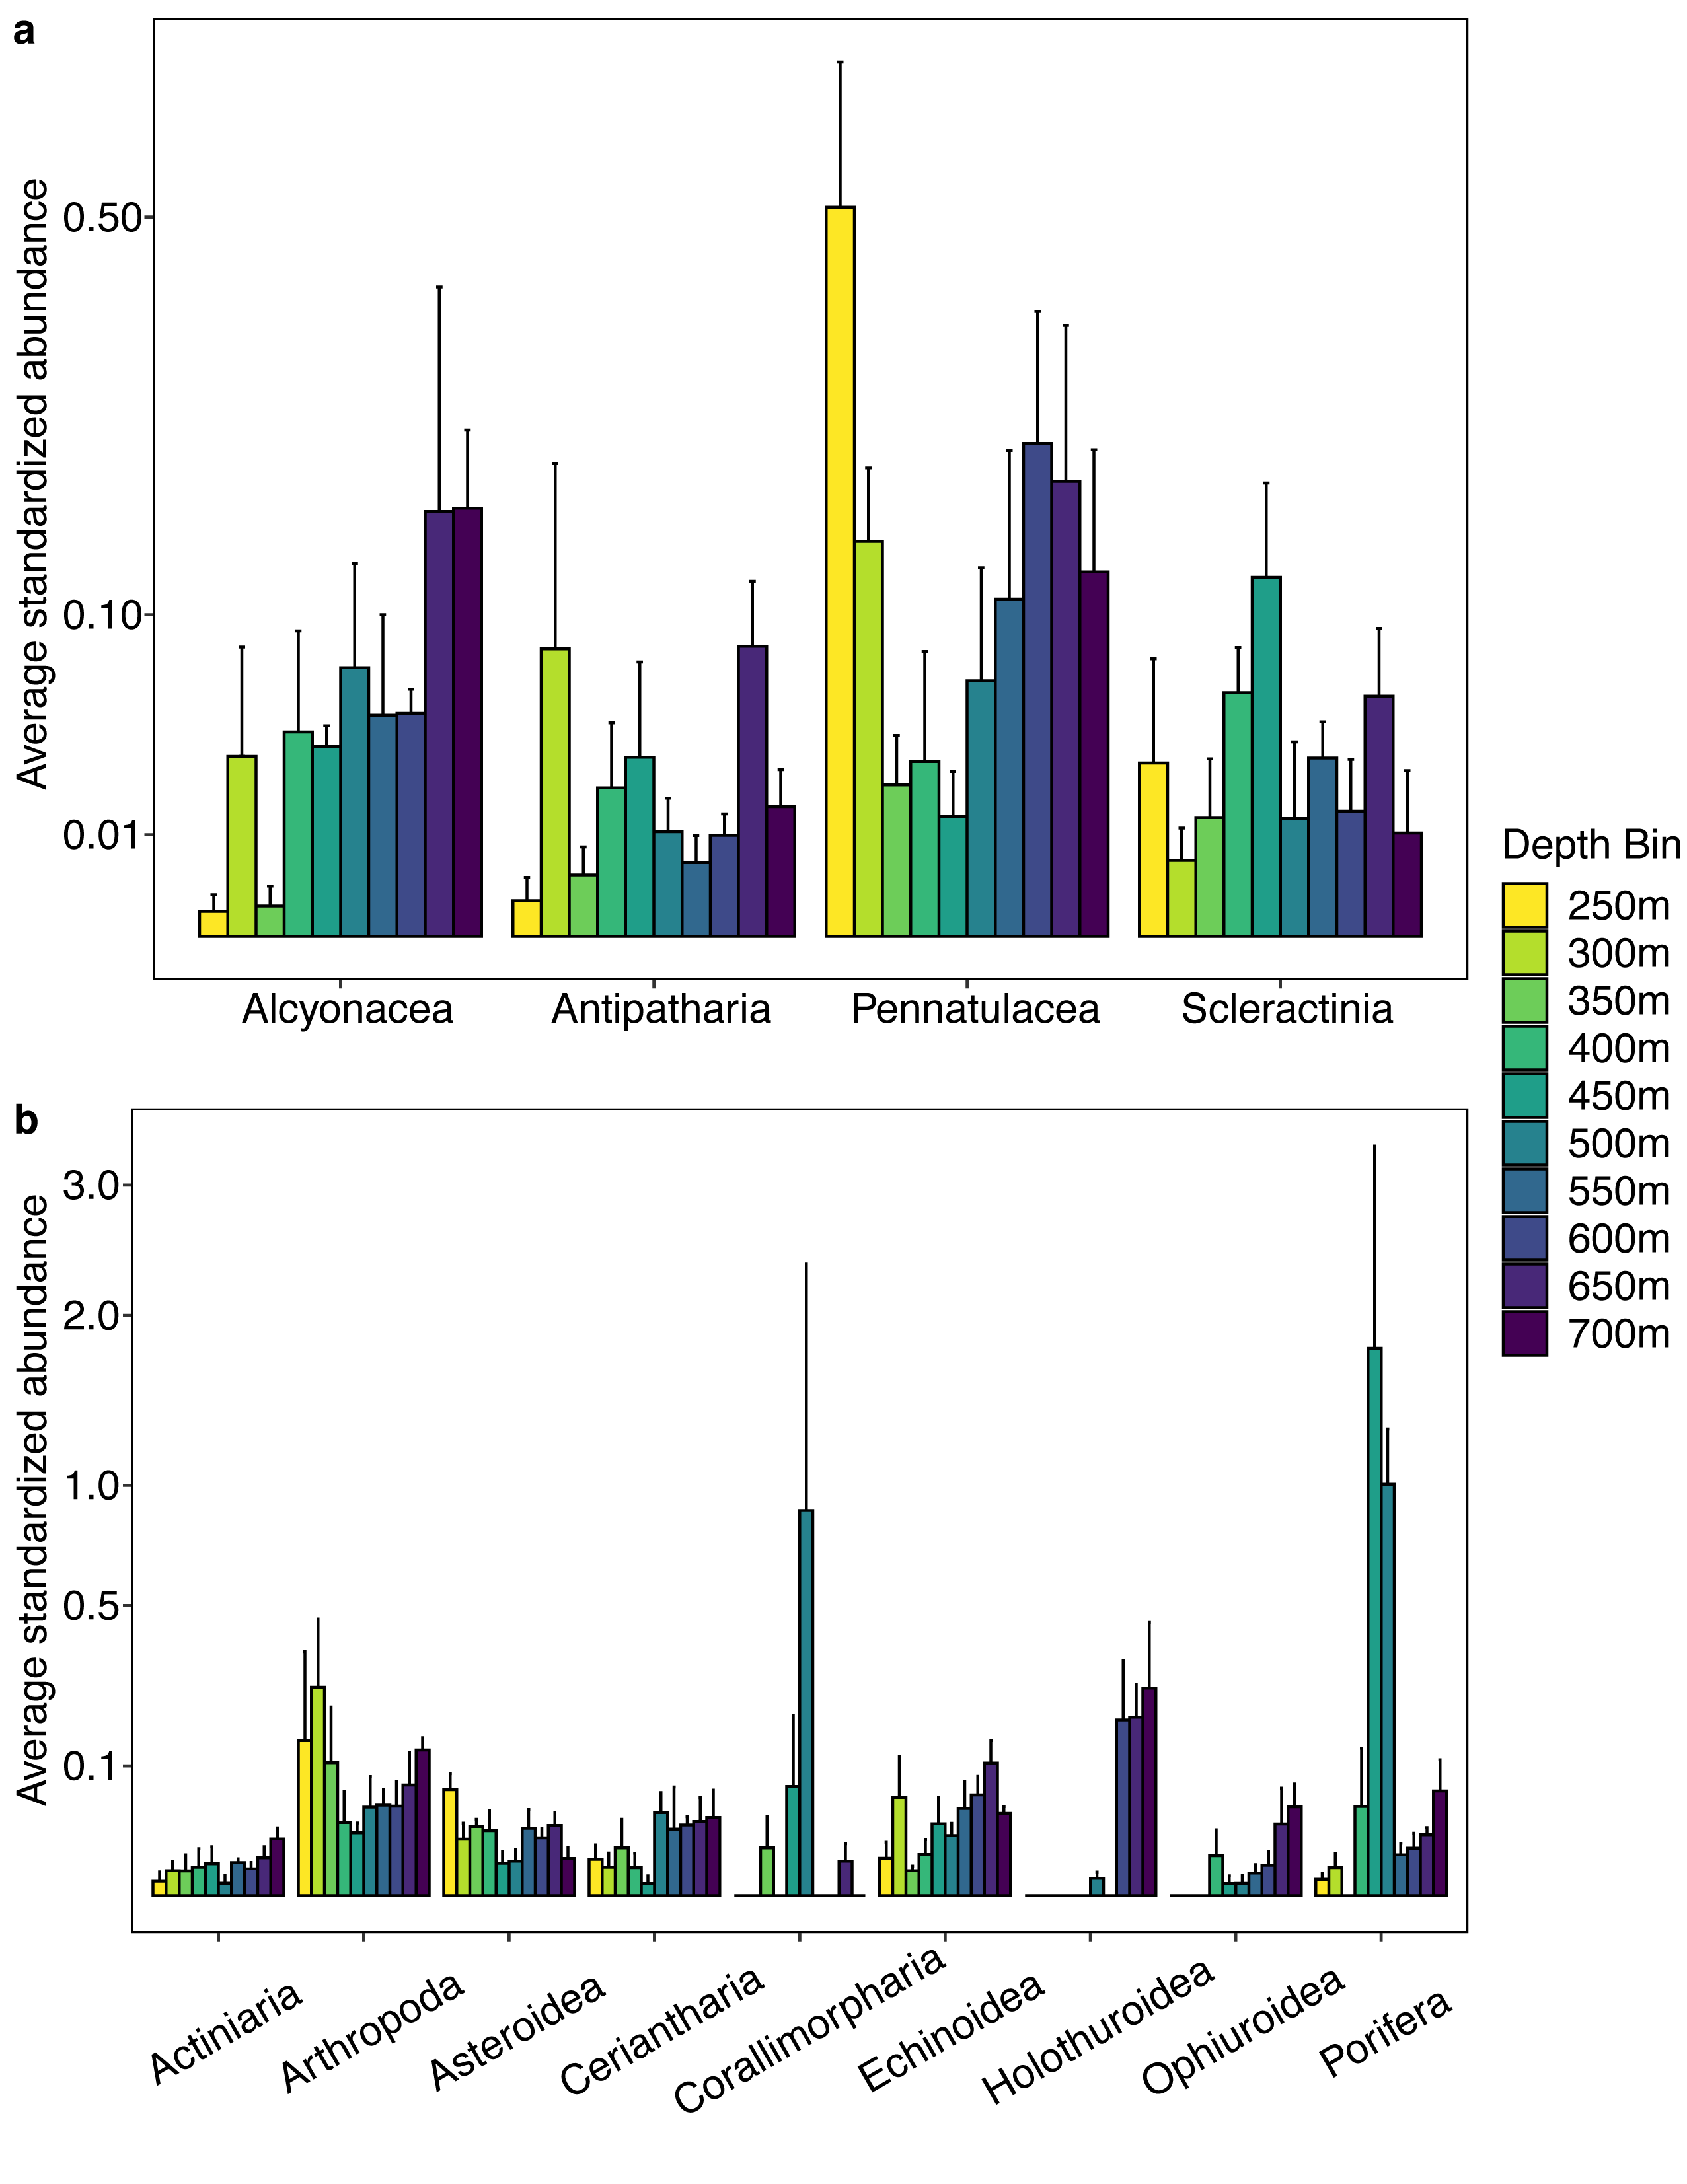


**Supplementary Figure 1.** Abundances for (a) the dominant coral taxa and (b) the other dominant invertebrates on the north slope of Mokumanamana. Y-axis is square root transformed for better visualization.


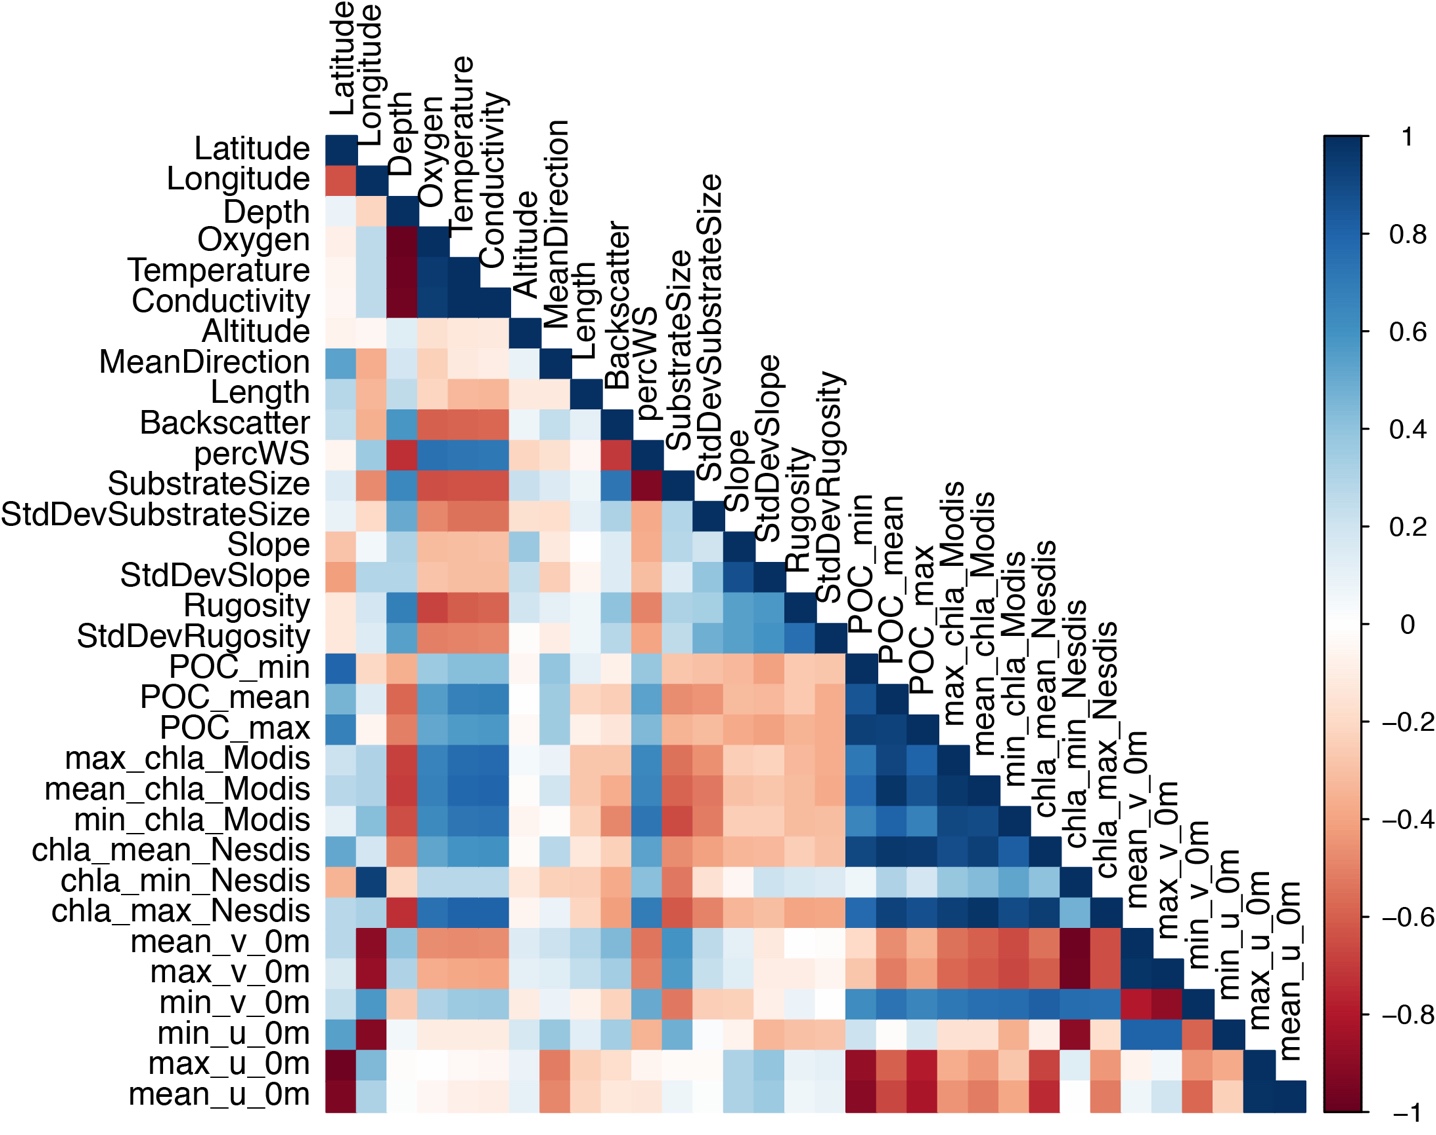


**Supplementary Figure 2.** Correlation plot for all environmental variables collected.


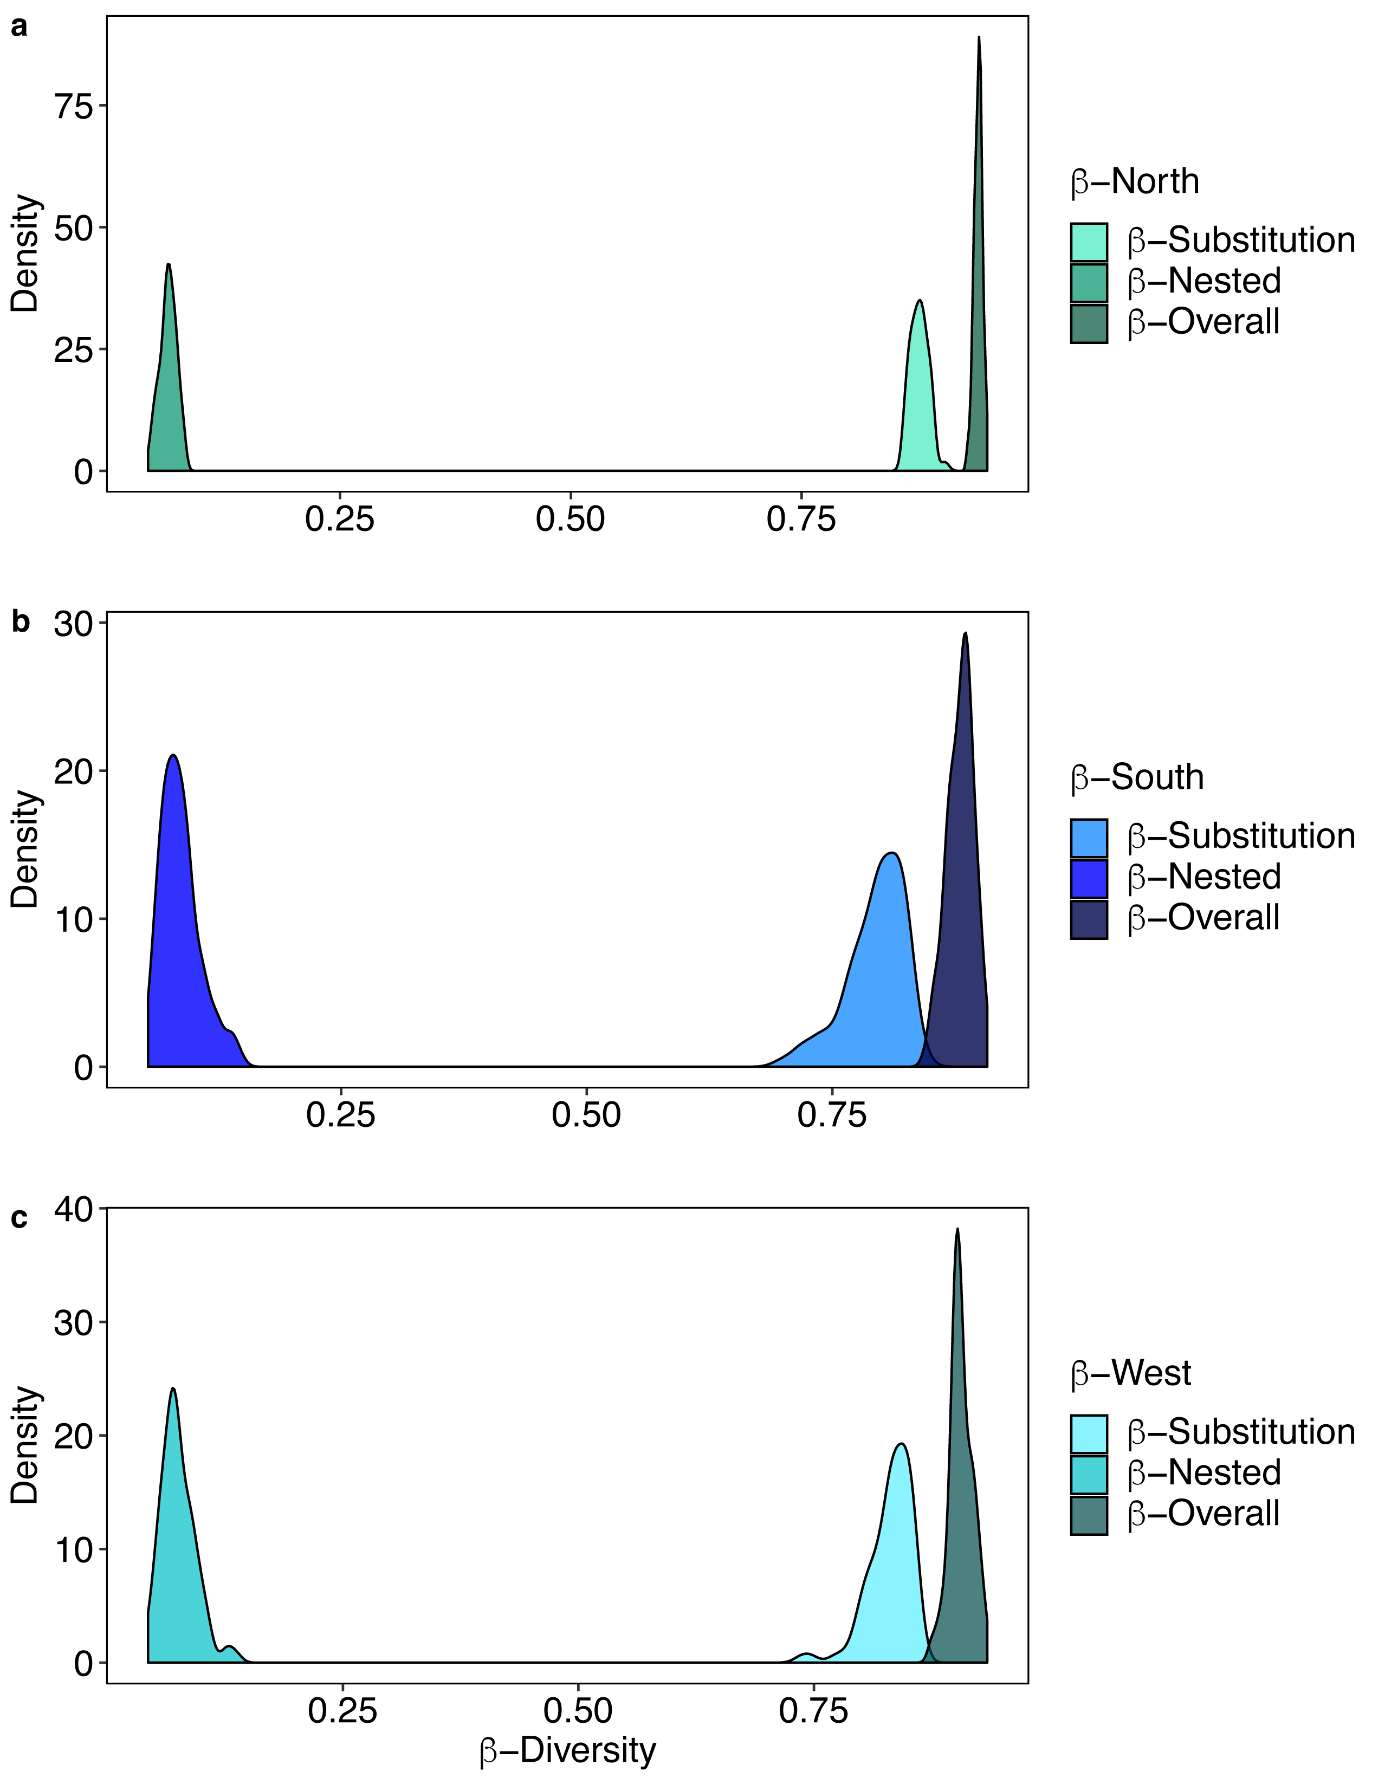


**Supplementary Figure 3**. Density plots for abundance-based beta-diversity analysis with each slope resampled 100 times. Panels: a – North side, b – South side, c – West side.


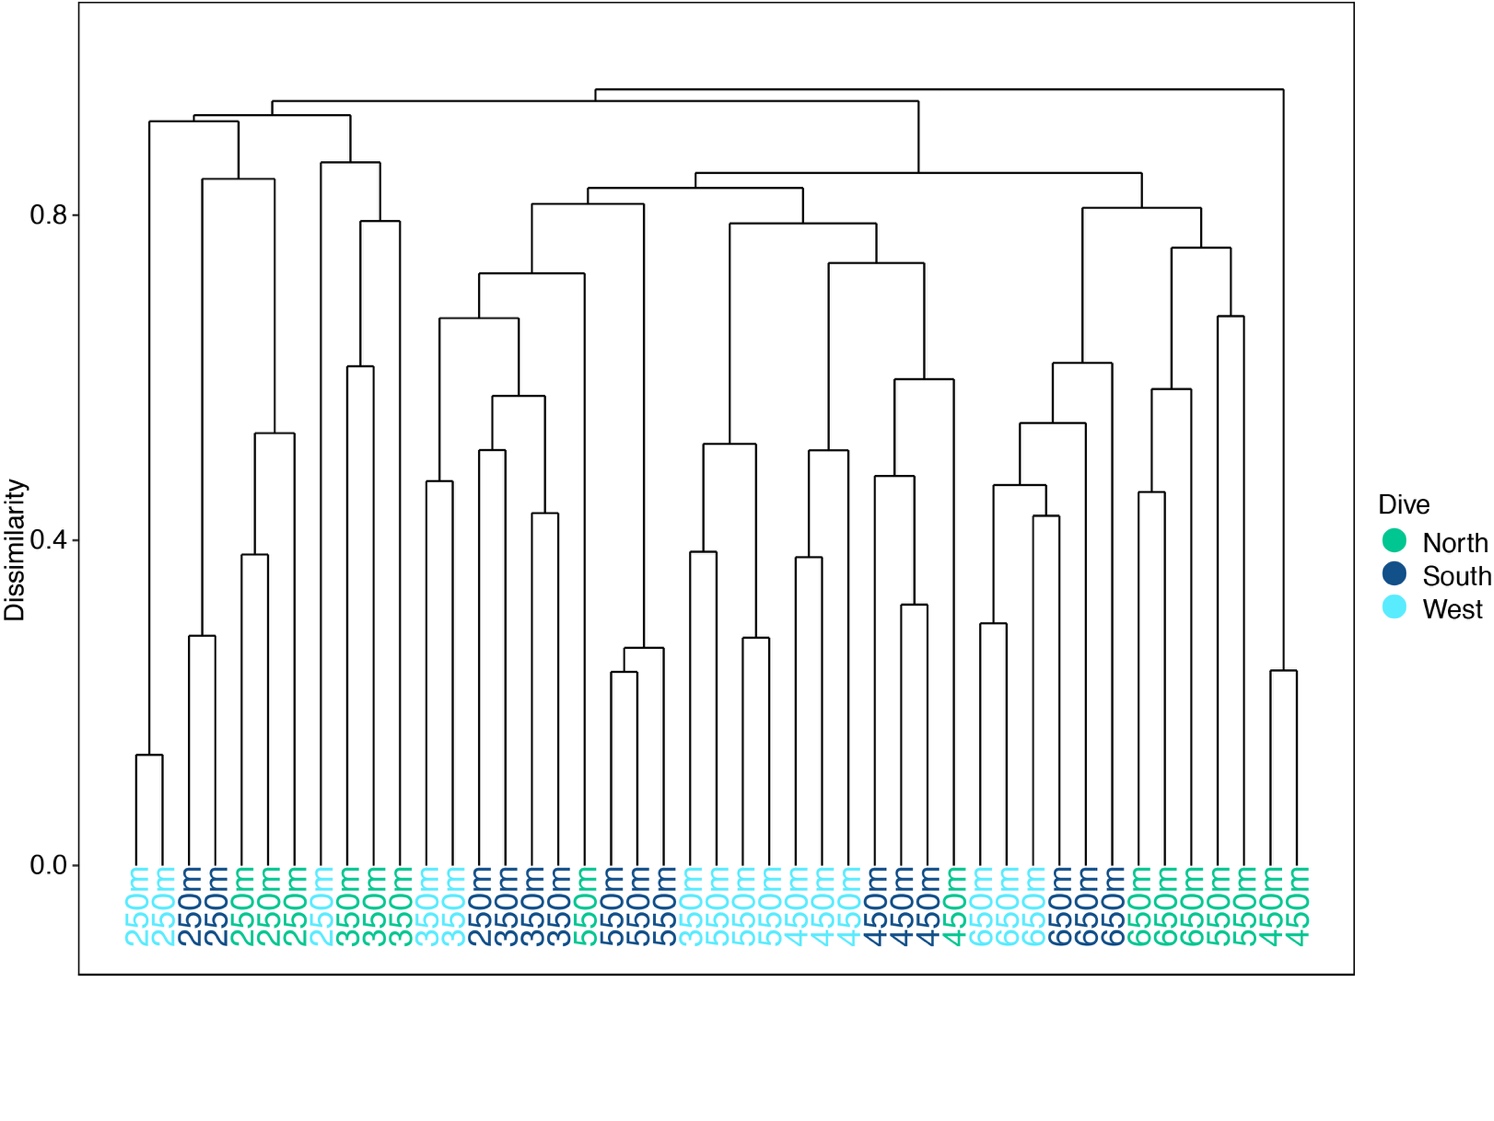


**Supplementary Figure 4.** Hierarchical cluster diagram for all transects on Mokumanamana. Rightmost transects at 450 m depth were removed from analysis as outliers.


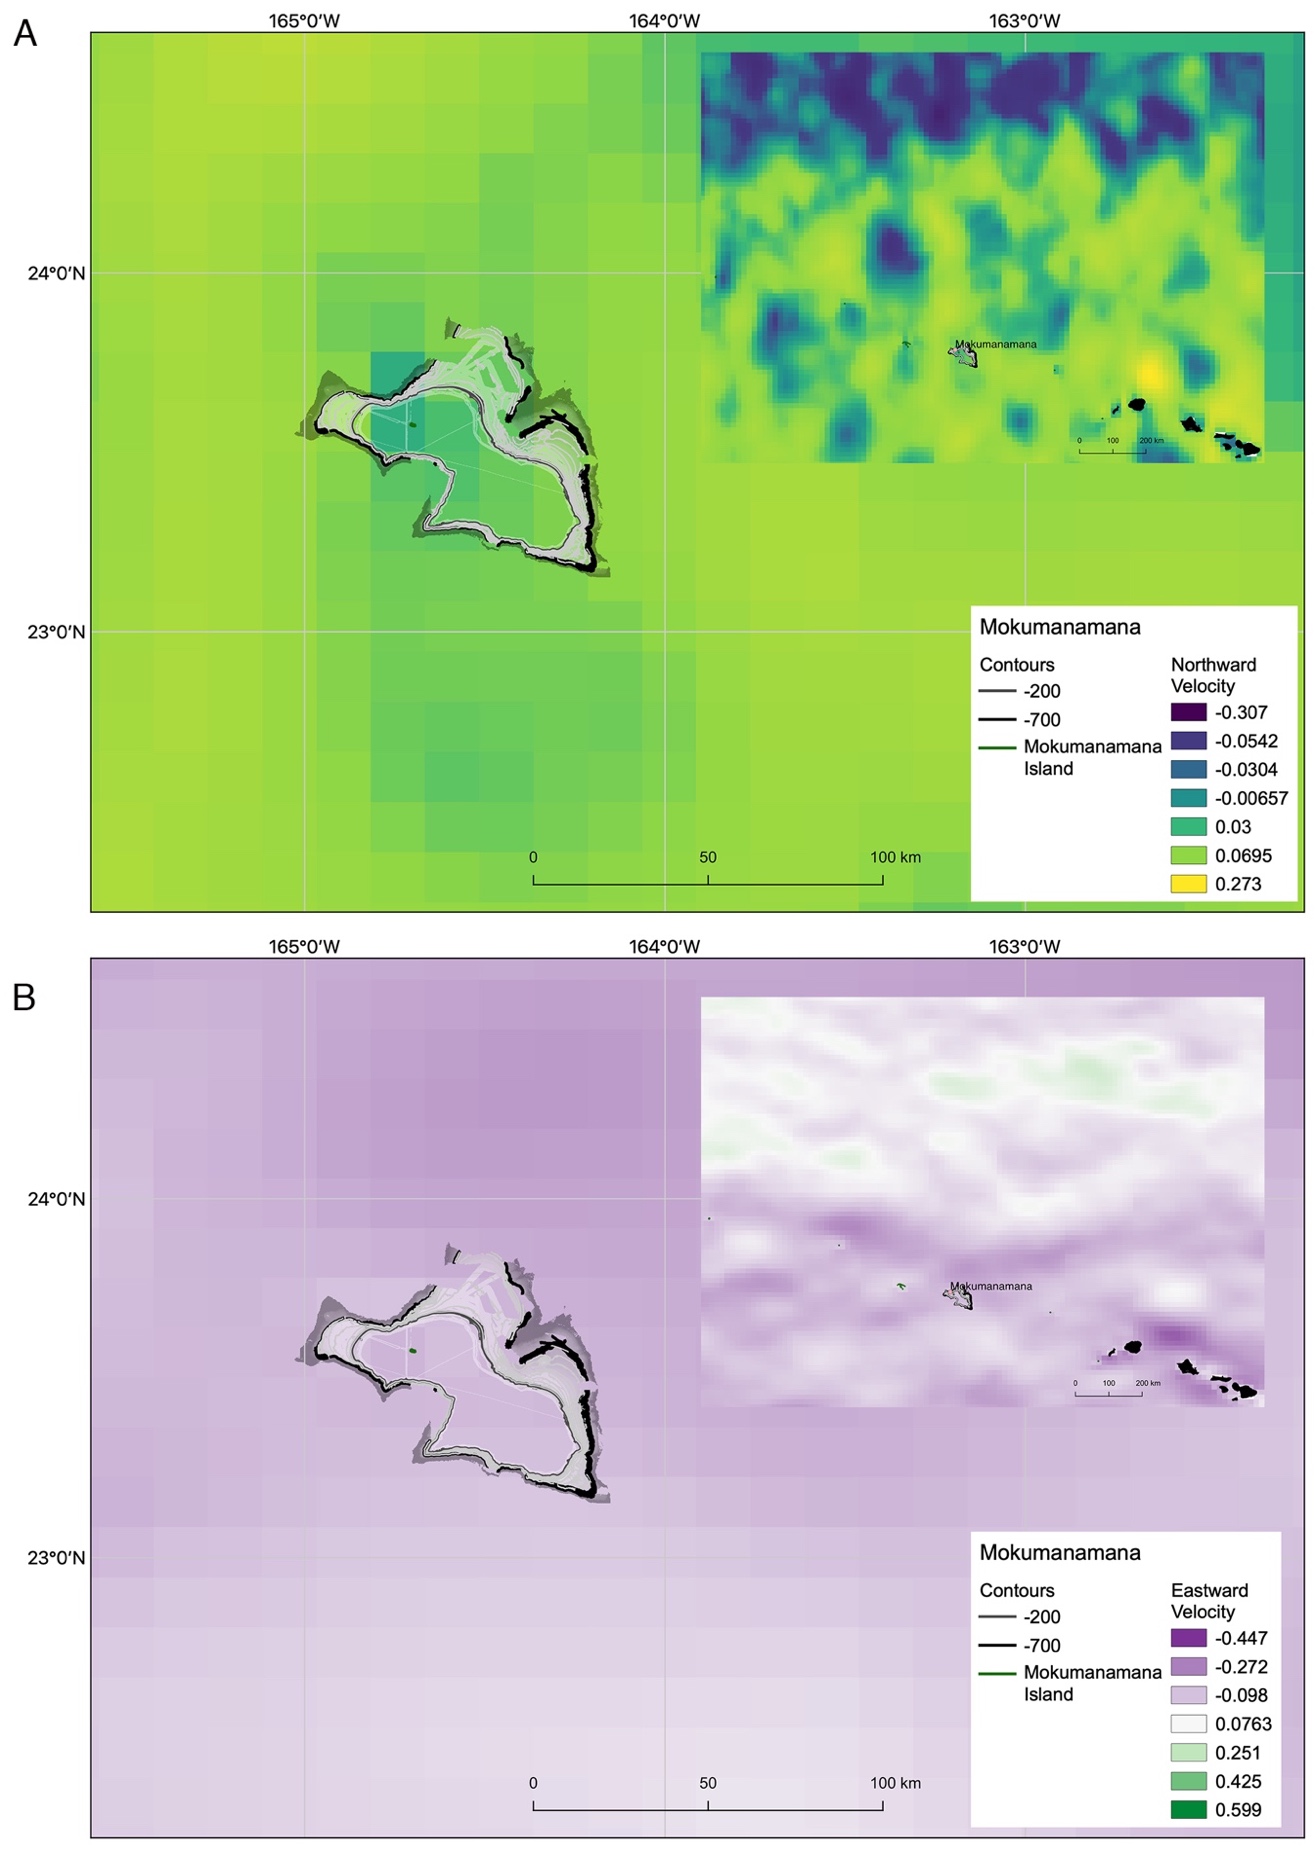


**Supplementary Figure 5**. Eight-year average surface currents for (A) northward and (B) eastward velocities from HYCOM database. ­­­
